# Supplementary material
Source: MDPI journal article supplement (https://www.mdpi.com/2079-9284/10/3/82)
Supplement: s1 [file s1]

## Supplementary materials

# Optimization of the Composition of a Cosmetic Formulation Containing *Tremella fuciformis* Extract (Fungi)

Bartosz Woźniak, Jagoda Chudzińska, Paulina Szczyglewska, Izabela Nowak and Agnieszka Feliczak-Guzik \*

Faculty of Chemistry, Adam Mickiewicz University in Poznań, Uniwersytetu  
Poznańskiego 8,  
61-614 Poznań, Poland; barwoz6@amu.edu.pl (B.W.); jagchu1@st.amu.edu.pl (J.C.);  
paulina.debek@amu.edu.pl (P.S.); nowakiza@amu.edu.pl (I.N.)  
\* Correspondence: agaguzik@amu.edu.pl; Tel.: +48-618291747

**Table S1.** Dermatological test results in 48 and 72 hours after application.

| Volunteers | Results after 48 h |                       | Results after 72 h |                            |
|------------|--------------------|-----------------------|--------------------|----------------------------|
|            | Erythema           | Swelling/Infiltration | Erythema           | Swelling /<br>Infiltration |
| 1          | 0                  | 0                     | 0                  | 0                          |
| 2          | 0                  | 0                     | 0                  | 0                          |
| 3          | 0                  | 0                     | 0                  | 0                          |
| 4          | 0                  | 0                     | 0                  | 0                          |
| 5          | 0                  | 0                     | 0                  | 0                          |
| 6          | 0                  | 0                     | 0                  | 0                          |
| 7          | 0                  | 0                     | 0                  | 0                          |
| 8          | 0                  | 0                     | 0                  | 0                          |
| 9          | 0                  | 0                     | 0                  | 0                          |
| 10         | 0                  | 0                     | 0                  | 0                          |
| 11         | 0                  | 0                     | 0                  | 0                          |
| 12         | 0                  | 0                     | 0                  | 0                          |
| 13         | 0                  | 0                     | 0                  | 0                          |
| 14         | 0                  | 0                     | 0                  | 0                          |
| 15         | 0                  | 0                     | 0                  | 0                          |
| 16         | 0                  | 0                     | 0                  | 0                          |
| 17         | 0                  | 0                     | 0                  | 0                          |
| 18         | 0                  | 0                     | 0                  | 0                          |
| 19         | 0                  | 0                     | 0                  | 0                          |
| 20         | 0                  | 0                     | 0                  | 0                          |
